# Supplementary material
Source: MDPI journal article supplement (https://www.mdpi.com/2073-4395/11/6/1130)
Supplement: s1 [file s1]

**Supplementary Table S1: Average, range values and BLUEs for saccharification efficiency in RILs of the MAGIC population**

| RILs                     | Saccharification (nmol/mg material.hour) |
|--------------------------|------------------------------------------|
| <b>Means</b>             | <b>138.4±1.8</b>                         |
| <b>Range</b>             | <b>105.9-175.1</b>                       |
| <b>LSD (P &lt; 0.05)</b> | <b>22.3</b>                              |
| EPS21LR-241              | 141.9                                    |
| EPS21LR-242              | 138.1                                    |
| EPS21LR-243              | 154.6                                    |
| EPS21LR-244              | 147.5                                    |
| EPS21LR-245              | 136.1                                    |
| EPS21LR-246              | 148.4                                    |
| EPS21LR-247              | 128.6                                    |
| EPS21LR-248              | 158.4                                    |
| EPS21LR-249              | 138.0                                    |
| EPS21LR-250              | 141.0                                    |
| EPS21LR-251              | 134.8                                    |
| EPS21LR-253              | 126.7                                    |
| EPS21LR-254              | 137.8                                    |
| EPS21LR-255              | 140.0                                    |
| EPS21LR-256              | 136.6                                    |
| EPS21LR-257              | 121.8                                    |
| EPS21LR-258              | 136.7                                    |
| EPS21LR-259              | 158.3                                    |
| EPS21LR-260              | 105.9                                    |
| EPS21LR-261              | 150.0                                    |
| EPS21LR-262              | 132.1                                    |
| EPS21LR-264              | 134.7                                    |
| EPS21LR-265              | 130.8                                    |
| EPS21LR-267              | 115.8                                    |
| EPS21LR-268              | 131.5                                    |
| EPS21LR-270              | 143.0                                    |
| EPS21LR-271              | 137.3                                    |
| EPS21LR-273              | 124.6                                    |
| EPS21LR-275              | 141.2                                    |
| EPS21LR-276              | 117.0                                    |
| EPS21LR-277              | 123.3                                    |
| EPS21LR-278              | 133.6                                    |
| EPS21LR-279              | 121.8                                    |
| EPS21LR-280              | 120.5                                    |
| EPS21LR-281              | 138.5                                    |
| EPS21LR-283              | 121.7                                    |
| EPS21LR-284              | 116.5                                    |
| EPS21LR-285              | 120.5                                    |
| EPS21LR-286              | 124.5                                    |
| EPS21LR-287              | 137.7                                    |
| EPS21LR-288              | 144.7                                    |
| EPS21LR-289              | 124.2                                    |
| EPS21LR-290              | 144.5                                    |

|             |       |
|-------------|-------|
| EPS21LR-291 | 130.5 |
| EPS21LR-294 | 136.0 |
| EPS21LR-295 | 128.3 |
| EPS21LR-296 | 147.6 |
| EPS21LR-297 | 130.4 |
| EPS21LR-299 | 143.0 |
| EPS21LR-300 | 141.0 |
| EPS21LR-301 | 130.1 |
| EPS21LR-304 | 156.3 |
| EPS21LR-305 | 140.3 |
| EPS21LR-307 | 135.1 |
| EPS21LR-308 | 134.8 |
| EPS21LR-310 | 139.5 |
| EPS21LR-311 | 144.5 |
| EPS21LR-312 | 127.0 |
| EPS21LR-313 | 145.5 |
| EPS21LR-314 | 142.0 |
| EPS21LR-316 | 133.1 |
| EPS21LR-317 | 126.9 |
| EPS21LR-318 | 137.4 |
| EPS21LR-319 | 133.7 |
| EPS21LR-321 | 147.6 |
| EPS21LR-322 | 127.9 |
| EPS21LR-323 | 142.0 |
| EPS21LR-324 | 134.0 |
| EPS21LR-325 | 156.3 |
| EPS21LR-327 | 125.9 |
| EPS21LR-328 | 140.1 |
| EPS21LR-329 | 140.9 |
| EPS21LR-331 | 129.7 |
| EPS21LR-333 | 143.4 |
| EPS21LR-334 | 143.5 |
| EPS21LR-335 | 123.2 |
| EPS21LR-336 | 118.1 |
| EPS21LR-337 | 151.6 |
| EPS21LR-338 | 131.0 |
| EPS21LR-339 | 149.9 |
| EPS21LR-340 | 152.0 |
| EPS21LR-343 | 156.6 |
| EPS21LR-345 | 138.5 |
| EPS21LR-346 | 132.6 |
| EPS21LR-347 | 129.8 |
| EPS21LR-348 | 124.5 |
| EPS21LR-349 | 135.5 |
| EPS21LR-351 | 132.0 |
| EPS21LR-352 | 149.0 |
| EPS21LR-353 | 127.8 |
| EPS21LR-354 | 126.7 |
| EPS21LR-355 | 144.6 |
| EPS21LR-356 | 130.7 |
| EPS21LR-357 | 123.4 |
| EPS21LR-358 | 127.4 |

|             |       |
|-------------|-------|
| EPS21LR-359 | 138.2 |
| EPS21LR-360 | 138.7 |
| EPS21LR-361 | 123.2 |
| EPS21LR-362 | 133.2 |
| EPS21LR-363 | 138.5 |
| EPS21LR-364 | 153.7 |
| EPS21LR-365 | 143.0 |
| EPS21LR-366 | 133.7 |
| EPS21LR-367 | 140.8 |
| EPS21LR-370 | 136.6 |
| EPS21LR-378 | 122.6 |
| EPS21LR-379 | 147.5 |
| EPS21LR-380 | 144.7 |
| EPS21LR-381 | 152.6 |
| EPS21LR-382 | 145.6 |
| EPS21LR-384 | 139.9 |
| EPS21LR-385 | 129.2 |
| EPS21LR-386 | 143.0 |
| EPS21LR-388 | 138.2 |
| EPS21LR-389 | 157.1 |
| EPS21LR-391 | 138.8 |
| EPS21LR-393 | 137.6 |
| EPS21LR-395 | 157.9 |
| EPS21LR-396 | 153.9 |
| EPS21LR-397 | 141.3 |
| EPS21LR-398 | 123.8 |
| EPS21LR-399 | 134.9 |
| EPS21LR-400 | 142.6 |
| EPS21LR-404 | 142.6 |
| EPS21LR-405 | 152.1 |
| EPS21LR-406 | 143.9 |
| EPS21LR-407 | 148.5 |
| EPS21LR-408 | 147.4 |
| EPS21LR-409 | 129.1 |
| EPS21LR-410 | 140.1 |
| EPS21LR-411 | 124.4 |
| EPS21LR-412 | 156.3 |
| EPS21LR-413 | 131.4 |
| EPS21LR-414 | 118.3 |
| EPS21LR-415 | 110.6 |
| EPS21LR-416 | 135.6 |
| EPS21LR-419 | 143.7 |
| EPS21LR-420 | 144.8 |
| EPS21LR-421 | 143.2 |
| EPS21LR-422 | 141.4 |
| EPS21LR-424 | 141.2 |
| EPS21LR-426 | 124.2 |
| EPS21LR-427 | 127.3 |
| EPS21LR-428 | 149.4 |
| EPS21LR-430 | 136.8 |
| EPS21LR-433 | 144.9 |
| EPS21LR-436 | 151.4 |

|             |       |
|-------------|-------|
| EPS21LR-437 | 135.7 |
| EPS21LR-438 | 147.6 |
| EPS21LR-442 | 151.0 |
| EPS21LR-443 | 127.7 |
| EPS21LR-445 | 144.4 |
| EPS21LR-446 | 146.9 |
| EPS21LR-447 | 146.1 |
| EPS21LR-448 | 140.9 |
| EPS21LR-451 | 156.5 |
| EPS21LR-452 | 141.1 |
| EPS21LR-453 | 141.6 |
| EPS21LR-454 | 142.7 |
| EPS21LR-455 | 133.3 |
| EPS21LR-456 | 143.0 |
| EPS21LR-457 | 147.0 |
| EPS21LR-458 | 146.3 |
| EPS21LR-459 | 139.2 |
| EPS21LR-460 | 139.1 |
| EPS21LR-461 | 149.3 |
| EPS21LR-462 | 128.4 |
| EPS21LR-463 | 128.7 |
| EPS21LR-467 | 140.0 |
| EPS21LR-468 | 136.8 |
| EPS21LR-470 | 133.1 |
| EPS21LR-472 | 118.1 |
| EPS21LR-473 | 153.1 |
| EPS21LR-474 | 148.7 |
| EPS21LR-475 | 134.6 |
| EPS21LR-476 | 130.8 |
| EPS21LR-477 | 134.5 |
| EPS21LR-478 | 128.6 |
| EPS21LR-479 | 140.4 |
| EPS21LR-482 | 152.8 |
| EPS21LR-483 | 141.0 |
| EPS21LR-487 | 156.6 |
| EPS21LR-488 | 142.6 |
| EPS21LR-489 | 149.0 |
| EPS21LR-491 | 152.2 |
| EPS21LR-494 | 128.2 |
| EPS21LR-496 | 135.9 |
| EPS21LR-497 | 132.9 |
| EPS21LR-500 | 135.3 |
| EPS21LR-502 | 158.1 |
| EPS21LR-503 | 149.0 |
| EPS21LR-504 | 138.9 |
| EPS21LR-508 | 163.1 |
| EPS21LR-509 | 149.8 |
| EPS21LR-511 | 142.9 |
| EPS21LR-512 | 151.8 |
| EPS21LR-513 | 129.3 |
| EPS21LR-514 | 135.9 |
| EPS21LR-515 | 164.5 |

|             |       |
|-------------|-------|
| EPS21LR-517 | 152.8 |
| EPS21LR-520 | 137.3 |
| EPS21LR-521 | 144.4 |
| EPS21LR-522 | 115.3 |
| EPS21LR-523 | 134.1 |
| EPS21LR-524 | 119.5 |
| EPS21LR-526 | 115.7 |
| EPS21LR-529 | 130.3 |
| EPS21LR-530 | 136.0 |
| EPS21LR-531 | 130.3 |
| EPS21LR-533 | 146.6 |
| EPS21LR-534 | 136.4 |
| EPS21LR-535 | 141.3 |
| EPS21LR-537 | 139.3 |
| EPS21LR-538 | 134.7 |
| EPS21LR-539 | 146.1 |
| EPS21LR-541 | 137.1 |
| EPS21LR-542 | 131.0 |
| EPS21LR-543 | 135.7 |
| EPS21LR-544 | 134.3 |
| EPS21LR-545 | 128.6 |
| EPS21LR-546 | 138.8 |
| EPS21LR-547 | 142.6 |
| EPS21LR-548 | 132.3 |
| EPS21LR-550 | 149.0 |
| EPS21LR-552 | 128.9 |
| EPS21LR-553 | 139.2 |
| EPS21LR-555 | 135.1 |
| EPS21LR-556 | 137.4 |
| EPS21LR-558 | 130.1 |
| EPS21LR-559 | 137.8 |
| EPS21LR-560 | 130.3 |
| EPS21LR-561 | 142.2 |
| EPS21LR-563 | 122.6 |
| EPS21LR-564 | 147.7 |
| EPS21LR-567 | 136.9 |
| EPS21LR-568 | 140.7 |
| EPS21LR-569 | 142.3 |
| EPS21LR-570 | 135.3 |
| EPS21LR-571 | 133.4 |
| EPS21LR-572 | 132.2 |
| EPS21LR-573 | 140.9 |
| EPS21LR-574 | 138.3 |
| EPS21LR-576 | 124.6 |
| EPS21LR-577 | 137.4 |
| EPS21LR-578 | 123.8 |
| EPS21LR-579 | 140.7 |
| EPS21LR-580 | 147.0 |
| EPS21LR-581 | 130.1 |
| EPS21LR-582 | 146.6 |
| EPS21LR-583 | 156.7 |
| EPS21LR-584 | 160.1 |

|             |       |
|-------------|-------|
| EPS21LR-585 | 145.7 |
| EPS21LR-586 | 151.5 |
| EPS21LR-589 | 128.9 |
| EPS21LR-590 | 146.9 |
| EPS21LR-591 | 140.3 |
| EPS21LR-593 | 148.1 |
| EPS21LR-594 | 159.1 |
| EPS21LR-595 | 136.3 |
| EPS21LR-596 | 146.3 |
| EPS21LR-597 | 127.8 |
| EPS21LR-598 | 156.8 |
| EPS21LR-600 | 138.1 |
| EPS21LR-602 | 132.1 |
| EPS21LR-603 | 133.2 |
| EPS21LR-604 | 152.1 |
| EPS21LR-605 | 130.8 |
| EPS21LR-606 | 145.0 |
| EPS21LR-607 | 155.9 |
| EPS21LR-608 | 135.2 |
| EPS21LR-609 | 142.8 |
| EPS21LR-614 | 133.9 |
| EPS21LR-615 | 133.1 |
| EPS21LR-616 | 139.6 |
| EPS21LR-617 | 130.8 |
| EPS21LR-618 | 131.6 |
| EPS21LR-619 | 128.1 |
| EPS21LR-620 | 140.9 |
| EPS21LR-621 | 129.4 |
| EPS21LR-623 | 153.4 |
| EPS21LR-624 | 125.8 |
| EPS21LR-625 | 144.7 |
| EPS21LR-626 | 141.9 |
| EPS21LR-627 | 131.0 |
| EPS21LR-628 | 132.6 |
| EPS21LR-629 | 113.3 |
| EPS21LR-630 | 125.5 |
| EPS21LR-631 | 129.1 |
| EPS21LR-633 | 130.6 |
| EPS21LR-634 | 136.6 |
| EPS21LR-635 | 126.6 |
| EPS21LR-637 | 138.2 |
| EPS21LR-640 | 148.6 |
| EPS21LR-641 | 138.6 |
| EPS21LR-642 | 135.6 |
| EPS21LR-643 | 115.0 |
| EPS21LR-644 | 131.9 |
| EPS21LR-645 | 129.2 |
| EPS21LR-646 | 146.5 |
| EPS21LR-647 | 139.3 |
| EPS21LR-648 | 136.4 |
| EPS21LR-653 | 145.4 |
| EPS21LR-655 | 152.1 |

|             |       |
|-------------|-------|
| EPS21LR-657 | 140.2 |
| EPS21LR-658 | 145.7 |
| EPS21LR-660 | 137.6 |
| EPS21LR-661 | 122.7 |
| EPS21LR-662 | 146.8 |
| EPS21LR-663 | 150.7 |
| EPS21LR-664 | 131.1 |
| EPS21LR-665 | 138.5 |
| EPS21LR-666 | 135.0 |
| EPS21LR-667 | 138.3 |
| EPS21LR-668 | 152.0 |
| EPS21LR-669 | 130.0 |
| EPS21LR-670 | 126.6 |
| EPS21LR-671 | 137.1 |
| EPS21LR-672 | 160.6 |
| EPS21LR-674 | 146.6 |
| EPS21LR-675 | 123.4 |
| EPS21LR-676 | 138.2 |
| EPS21LR-677 | 132.7 |
| EPS21LR-678 | 130.7 |
| EPS21LR-679 | 159.9 |
| EPS21LR-682 | 133.7 |
| EPS21LR-684 | 144.7 |
| EPS21LR-686 | 142.1 |
| EPS21LR-688 | 143.4 |
| EPS21LR-691 | 130.3 |
| EPS21LR-693 | 130.3 |
| EPS21LR-694 | 162.8 |
| EPS21LR-695 | 158.5 |
| EPS21LR-698 | 115.9 |
| EPS21LR-701 | 143.0 |
| EPS21LR-703 | 123.3 |
| EPS21LR-704 | 135.4 |
| EPS21LR-705 | 136.2 |
| EPS21LR-706 | 135.0 |
| EPS21LR-707 | 135.7 |
| EPS21LR-708 | 153.0 |
| EPS21LR-709 | 141.2 |
| EPS21LR-710 | 125.0 |
| EPS21LR-711 | 133.0 |
| EPS21LR-714 | 130.7 |
| EPS21LR-715 | 136.7 |
| EPS21LR-716 | 153.4 |
| EPS21LR-717 | 137.5 |
| EPS21LR-718 | 144.9 |
| EPS21LR-719 | 151.2 |
| EPS21LR-720 | 154.4 |
| EPS21LR-721 | 137.0 |
| EPS21LR-722 | 136.4 |
| EPS21LR-723 | 175.1 |
| EPS21LR-724 | 142.4 |
| EPS21LR-725 | 135.6 |

|             |       |
|-------------|-------|
| EPS21LR-726 | 154.2 |
| EPS21LR-727 | 133.7 |
| EPS21LR-732 | 142.1 |
| EPS21LR-733 | 157.6 |
| EPS21LR-734 | 139.0 |
| EPS21LR-736 | 141.0 |
| EPS21LR-738 | 135.8 |
| EPS21LR-740 | 126.5 |
| EPS21LR-741 | 160.5 |
| EPS21LR-742 | 126.4 |
| EPS21LR-743 | 145.3 |
| EPS21LR-744 | 145.5 |
| EPS21LR-745 | 135.8 |
| EPS21LR-746 | 140.1 |
| EPS21LR-748 | 115.0 |
| EPS21LR-749 | 146.9 |
| EPS21LR-750 | 133.7 |
| EPS21LR-751 | 145.1 |
| EPS21LR-752 | 140.9 |
| EPS21LR-753 | 137.2 |
| EPS21LR-754 | 135.6 |
| EPS21LR-759 | 134.9 |
| EPS21LR-760 | 145.4 |
| EPS21LR-764 | 132.4 |
| EPS21LR-765 | 132.5 |
| EPS21LR-767 | 141.7 |
| EPS21LR-768 | 144.4 |
